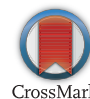

# Analyses of Results From Cardiovascular Safety Trials With DPP-4 Inhibitors: Cardiovascular Outcomes, Predefined Safety Outcomes, and Pooled Analysis and Meta-analysis

Edoardo Mannucci,<sup>1</sup> Ofri Mosenzon,<sup>2</sup> and Angelo Avogaro<sup>3</sup>

*Diabetes Care* 2016;39(Suppl. 2):S196–S204 | DOI: 10.2337/dcS15-3024

The U.S. Food and Drug Administration requires that the cardiovascular (CV) safety of all new drugs for diabetes be demonstrated through pooled analyses of phase III studies or specifically designed trials. This requirement prompted several placebo-controlled, noninferiority CV safety trials in high-risk patients; to date, all completed trials showed that dipeptidyl peptidase (DPP)-4 inhibitors do not increase or reduce the risk of major CV events. These results apparently contrast with those of pooled analyses and meta-analyses of previous, smaller trials with metabolic end points, which had suggested a reduction of risk. However, the design of CV trials, which were required to demonstrate safety, is not adequate (for duration, management of concurrent therapies, etc.) for the assessment of potential therapeutic benefits. In addition, CV safety trials enroll patients at high risk of CV events, who are different from those included in earlier trials with metabolic end points. Differences in characteristics of patients enrolled probably account for most of the discrepancy in CV outcomes between CV safety studies and earlier trials. The availability of several large-scale trials with longer duration provides the unique opportunity for assessment of the safety of DPP-4 inhibitors not only with respect to major CV events but also with reference to other safety issues. For example, CV safety trials can be a source of information for pancreatitis, cancer, or hypoglycemia.

In December 2008, the U.S. Food and Drug Administration (FDA) published guidance prompting pooled analyses and meta-analyses of cardiovascular (CV) events (sometimes with post hoc adjudication) observed in trials with metabolic outcomes (1). A shift of emphasis occurred from short-term, HbA<sub>1c</sub>-centered phase II–III trials in “healthy” patients with type 2 diabetes to CV safety studies in a more vulnerable population (2). Results from the first trials according to the FDA guidance were published in 2013: the SAVOR-TIMI 53 (Saxagliptin Assessment of Vascular Outcomes Recorded in Patients with Diabetes Mellitus–Thrombolysis in Myocardial Infarction 53) and the EXAMINE (Examination of Cardiovascular Outcomes with Alogliptin versus Standard of Care) trials with the dipeptidyl peptidase (DPP)-4 inhibitors saxagliptin and alogliptin, respectively (3,4). The publication of the results of TECOS (Trial Evaluating Cardiovascular Outcomes with Sitagliptin) (5) with sitagliptin, the presentation of the ELIXA [Evaluation of Lixisenatide in Acute

<sup>1</sup>Diabetology, Careggi Hospital, Florence, Italy

<sup>2</sup>Internal Medicine, Hadassah Medical Center, Jerusalem, Israel

<sup>3</sup>Endocrinology, University of Padua, Padua, Italy

Corresponding author: Edoardo Mannucci, edoardo.mannucci@unifi.it.

This publication is based on the presentations at the 5th World Congress on Controversies to Consensus in Diabetes, Obesity and Hypertension (CODHy). The Congress and the publication of this supplement were made possible in part by unrestricted educational grants from AstraZeneca.

© 2016 by the American Diabetes Association. Readers may use this article as long as the work is properly cited, the use is educational and not for profit, and the work is not altered.

Coronary Syndrome] trial with the glucagon-like peptide 1 (GLP-1) receptor agonist lixisenatide, and the publication of the BI 10773 (Empagliflozin) Cardiovascular Outcome Event Trial in Type 2 Diabetes Mellitus Patients (EMPA-REG OUTCOME) trial with the sodium-glucose cotransporter 2 (SGLT2) inhibitor empagliflozin (6) followed in 2015. This wave of information on CV safety of new antidiabetes drugs (ADD) is only the beginning (Fig. 1 and Table 1). Interpretation of the “mountains” of new information provided by these large-scale studies presents new challenges for the treating physician, the scientific world, the pharmaceutical industry, and eventually patients with diabetes themselves (7).

Unexpectedly, in the case of DPP-4 inhibitors the results of earlier trials had suggested a reduction in the incidence of major CV events (8–10), which was not confirmed by the specifically

designed CV studies that followed (3–5). The reasons for this discrepancy are controversial and will be discussed in the article.

**Primary and Secondary Outcomes: CV Safety Outcomes**

*CV Outcome Versus CV Safety Trials*

The intensification of diabetes treatment appears to improve CV outcomes only in patients with recent-onset diabetes and after a prolonged latency (11,12). The FDA guidance requires the recruitment of patients at high CV risk, often with prolonged diabetes duration, advanced age, and renal failure (1), who are the least likely to benefit from any intervention regarding CV risk factors. In addition, most of those patients already receive multiple treatments for CV disease prevention. In the Steno-2 trial, the use of statins at the end of the intervention in the intensive versus conventional treatment arms was 0 vs. 3% at baseline

and 85 vs. 22% at the end of the intervention stage of the trial, respectively (13). In SAVOR-TIMI 53, EXAMINE, and TECOS, statins were used at baseline by 78.3, 90.4, and 79.9% of the trial population, respectively (3–5). The residual CV risk left, in spite of statin treatment, was smaller, and therefore any CV superiority was more difficult to prove.

The FDA requirements for new ADD development programs were to exclude an unacceptable increased relative CV risk with an upper limit of 95% CI of <1.3 (1). For this reason, trials are designed to show noninferiority between treatment arms with respect to CV events while maintaining similar glycemic control (14): investigators are free to modify glucose-lowering medications other than the experimental drug in order to maintain good glycemic control in both treatment groups, and in fact, between-group differences in HbA<sub>1c</sub>

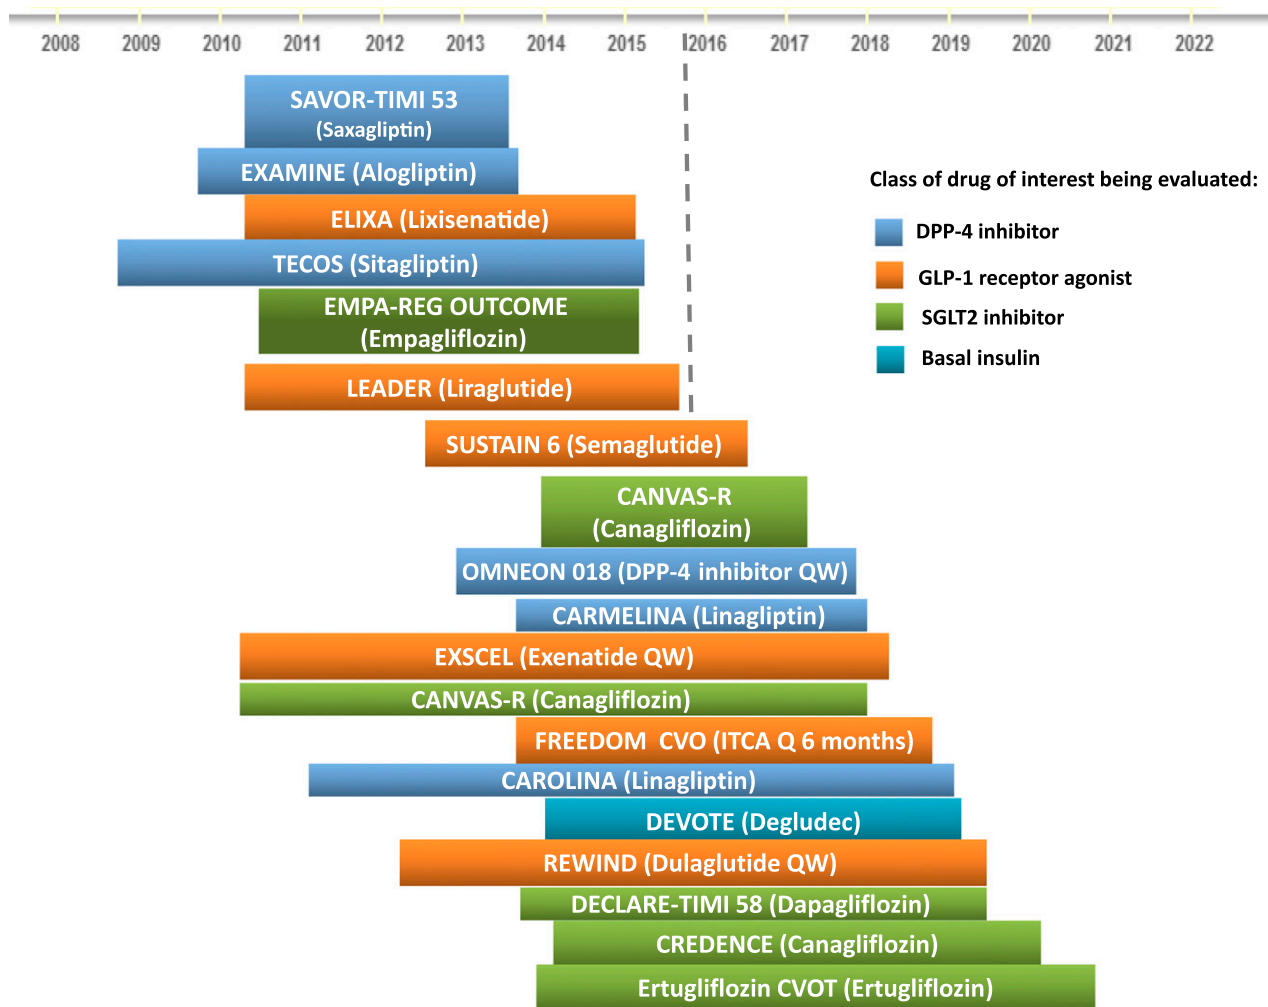

Figure 1—Timing of CV safety trials with drugs for type 2 diabetes.

**Table 1—Completed and ongoing CV safety trials with ADDs**

| Group of ADD and trial         | Tested drug (comparator if not placebo) | Patients (N) | Main CV inclusion criteria                                                                          | HbA <sub>1c</sub> inclusion criteria (%) | Background ADDs                                                         | Start-actual/planned completion, mean duration of follow-up | Primary outcome (number of target events)                        |
|--------------------------------|-----------------------------------------|--------------|-----------------------------------------------------------------------------------------------------|------------------------------------------|-------------------------------------------------------------------------|-------------------------------------------------------------|------------------------------------------------------------------|
| <b>DPP-4 inhibitors</b>        |                                         |              |                                                                                                     |                                          |                                                                         |                                                             |                                                                  |
| SAVOR-TIMI 53                  | Saxagliptin                             | 16,492       | ≥50 y.o + established CVD or ≥55 (M) or ≥60 (F) y.o + CVD risk factors                              | 6.5–12 during the last 6 months          | All other than incretin based                                           | 5/2010–5/2013, 2.1 years                                    | CV death, nonfatal MI, nonfatal stroke (1,040)                   |
| EXAMINE                        | Alogliptin                              | 5,380        | ACS within 15–90 days                                                                               | 6.5–11                                   | All other than incretin based                                           | 10/2009–6/2013, 1.5 years                                   | CV death, nonfatal MI, nonfatal stroke (550)                     |
| TECOS                          | Sitagliptin                             | 14,724       | Preexisting CVD                                                                                     | 6.5–8                                    | Mono- or dual therapy: metformin, SU, pioglitazone, insulin             | 12/2008–6/2013, 3.0 years                                   | CV death, nonfatal MI or stroke, hospitalization for UAP (1,300) |
| CAROLINA                       | Linagliptin (glimepride)                | 6,000        | CVD history, end-organ damage, ≥70 y.o., or CVD risk factors                                        | 6.5–8.5 or 6.5–7.5 if with SU/glinides   | Drug naïve or mono- or dual therapy: metformin, SU, AGI                 | 10/2010–9/2018                                              | CV death, nonfatal MI or stroke, hospitalization for UAP (631)   |
| CARMELINA                      | Linagliptin                             | 8,300        | Albuminuria + CVD or RF + specific albuminuria                                                      | 6.5–10.0                                 | All other than incretin based and SGLT2 Inh                             | 7/2013–1/2018                                               | CV death, nonfatal MI or stroke, hospitalization for UAP         |
| OMINEON 018                    | MK 3102 (once weekly)                   | 4,000        | Preexisting CVD                                                                                     | 6.5–10 or 7–10 (insulin, SU, glinides)   | All other than incretin based                                           | 10/2012–10/2017                                             | CV death, nonfatal MI or stroke, hospitalization for UAP         |
| <b>GLP-1 receptor agonists</b> |                                         |              |                                                                                                     |                                          |                                                                         |                                                             |                                                                  |
| ELIXA                          | Lixisenatide                            | 6,068        | ACS <180 days                                                                                       | 5.5–11.0                                 | All other than incretin based                                           | 6/2010–2/2015, 25.7 months                                  | CV death, nonfatal MI or stroke, hospitalization for UAP (844)   |
| LEADER                         | Liraglutide                             | 9,340        | ≥50 y.o + prior CVD events/PAD/CRF/ CHF or ≥60 y.o + CVD risk factors                               | >7.0                                     | All other than incretin based                                           | 9/2010–10/2015, all patients at least 3.5 years             | CV death, nonfatal MI, or nonfatal stroke (611)                  |
| SUSTAIN 6                      | Semaglutide QW                          | 3,297        | ≥50 y.o + prior CVD or ≥60 y.o + subclinical CVD                                                    | >7.0                                     | Drug naïve or mono- or dual oral therapy, long-acting or premix insulin | 2/2013–1/2016, up to 148 weeks                              | CV death, nonfatal MI, or nonfatal stroke                        |
| EXSCEL                         | Exenatide QW                            | 14,000       | none                                                                                                | 6.5–10                                   | 0–3 oral ADDs (including DPP-4 inh), insulin + 0–2 oral ADDs            | 6/2010–1/2018, up to 7.5 years                              | CV death, nonfatal MI, or nonfatal stroke                        |
| FREEDOM CVO                    | ITCA 650 exenatide Q 3–6 months         | 4,000        | History of CAD, cerebrovascular disease, or PAD                                                     | >6.5                                     | All other than incretin based                                           | 3/2013–7/2018, 2 years                                      | CV death, nonfatal MI or stroke, hospitalization for UAP         |
| REWIND                         | Dulaglutide QW                          | 9,622        | ≥50 y.o + established CVD, ≥55 y.o + subclinical vascular disease, or ≥60 y.o + ≥2 CVD risk factors | ≤9.5                                     | 0–2 oral ADDs ± basal insulin ± GLP-1 RA                                | 7/2011–4/2019, up to 8 years (expected mean of 6.5 years)   | CV death, nonfatal MI, or nonfatal stroke                        |
| Albiglutide CV safety trial    | Albiglutide QW                          | 9,400        | ≥40 y.o + established CVD                                                                           | >7                                       | All other than GLP-1 RA                                                 | 7/2015–5/2019                                               | CV death, nonfatal MI, or nonfatal stroke                        |
| <b>SGLT2 inhibitors</b>        |                                         |              |                                                                                                     |                                          |                                                                         |                                                             |                                                                  |
| EMPA-REG OUTCOME               | Empagliflozin (2 [10 mg, 25 mg]:1)      | 7,034        | >18 y.o., established CVD                                                                           | 7–10 (7–9 if ADD naïve)                  | ADD-naïve patients, all ADDs, or their combination                      | 7/2010–4/2015                                               | CV death, nonfatal MI, or nonfatal stroke (≥691)                 |
| CANVAS                         | Canagliflozin (2 [100 mg, 300 mg]:1)    | 4,407        | >30 y.o with established CVD or >50 y.o and ≥2 CV risk factors                                      | 7–10.5                                   | All ADDs                                                                | 12/2009–6/2017                                              | CV death, nonfatal MI, or nonfatal stroke                        |
| CANVAS-R                       | Canagliflozin                           | 5,865        | Established vascular complication or ≥2 CV risk factors                                             | 7–10.5                                   | ADD-naïve patients, all ADDs, or their combination                      | 1/2014–1/2017                                               | Number of patients with progression of albuminuria               |

*Continued on p. S199*

**Table 1—Continued**

| Group of ADD and trial | Tested drug (comparator if not placebo) | Patients (N) | Main CV inclusion criteria                                                                               | HbA <sub>1c</sub> inclusion criteria (%) | Background ADDs                         | Start–actual/planned completion, mean duration of follow-up | Primary outcome (number of target events)                                                  |
|------------------------|-----------------------------------------|--------------|----------------------------------------------------------------------------------------------------------|------------------------------------------|-----------------------------------------|-------------------------------------------------------------|--------------------------------------------------------------------------------------------|
| CREDESCENCE            | Canagliflozin                           | 3,627        | >30 y.o. urinary ACR 300–2,000 mg/g, eGFR 90–30 mL/min/BSA. Stable maximum tolerated dose of ACEI or ARB | 6.5–12                                   | All ADDs                                | 2/2014–1/2020                                               | ESRD, doubling of serum creatinine, renal or CV death                                      |
| DECLARE-TIMI 58        | Dapagliflozin                           | 17,150       | ≥50 y.o + established CVD or ≥55 (M) or ≥60 (F) y.o + CVD risk factors                                   | 6.5–12                                   | All ADDs other than pioglitazone        | 4/2013–4/2019                                               | CV death, nonfatal MI, or nonfatal stroke                                                  |
| Ertugliflozin CVOT     | Ertugliflozin [2 (5 mg, 15 mg):1]       | 3,900        | >40 y.o with established CVD                                                                             | 7–10.5                                   | Naïve or all ADDs (specific substudies) | 11/2013–6/2020                                              | CV death, nonfatal MI, or nonfatal stroke                                                  |
| Other drugs DEVOTE     | Insulin degludec vs. insulin glargine   | 7,637        | ≥50 y.o + established CVD or renal disease or ≥60 y.o + CVD risk factors                                 | ≥7 or <7 if >20 units insulin/day        | One or more oral or injectable ADDs     | 10/2013–12/2016                                             | CV death, nonfatal MI, or nonfatal stroke                                                  |
| TOSCA.IT               | Pioglitazone vs. SU (open label)        | 3,371        | 50–75 y.o. >2 years' diabetes duration                                                                   | 7–9                                      | >2 months, metformin >2 g               | 9/2008–12/2018                                              | All-cause mortality, nonfatal MI, or nonfatal stroke, unplanned coronary revascularization |

ACEI, ACE inhibitor; ACR, albumin-to-creatinine ratio; AGI, α-glucosidase inhibitors; ARB, angiotensin receptor blocker; CAD, coronary artery disease; CANVAS, Canagliflozin Cardiovascular Assessment Study; CANVAS-R, A Study of the Effects of Canagliflozin on Renal Endpoints in Adult Participants With Type 2 Diabetes Mellitus; CARMELINA, Cardiovascular and Renal Microvascular Outcome Study with LINAGlIPTIN in patients with type 2 diabetes mellitus; CAROLINA, Cardiovascular Outcome Study of LINAGlIPTIN Versus Glimepiride in Patients with Type 2 Diabetes; CHF, congestive heart failure; CREDESCENCE, Canagliflozin and Renal Events in Diabetes with Established Nephropathy Clinical Evaluation; CRF, chronic renal failure; CVD, CV disease; DECLARE-TIMI 58, Dapagliflozin Effect on Cardiovascular Events; DEVOTE, Degludec Cardiovascular Outcomes Trial; eGFR, estimated glomerular filtration rate; ESRD, end-stage renal disease; EXSCEL, Exenatide Study of Cardiovascular Event Lowering; F, female; Inh, inhibitor; LEADER, Liraglutide Effect and Action in Diabetes: Evaluation of cardiovascular outcome Results—A Long Term Evaluation; M, male; MI, myocardial infarction; PAD, peripheral arterial disease; RA, receptor agonist; REWIND, Researching Cardiovascular Events With a Weekly INcretin in Diabetes; RF, renal failure; TOSCA.IT, Thiazolidinediones or Sulphonylureas and Cardiovascular Accidents Intervention Trial; UAP, unstable angina pectoris; y.o., years old.

are small (3–5). Conversely, in superiority trials the study is designed to highlight the benefits of drug treatment: for example, in lipid trials additional lipid-lowering therapies could not be modified during the study, creating a sizable difference in the surrogate marker (e.g., LDL cholesterol) that would hopefully lead to improved CV outcome.

The FDA required the CV safety trials to extend for a minimum of 2 years. A longer trial duration increases the risk for missing data (6), possibly affecting the magnitude and even the direction of results (15). The short duration of CV trials is also driven by market issues, such as patent duration, the extravagant cost of large clinical trials (the three currently available trials with DPP-4 inhibitors alone, taken together, accumulated >85,000 patient-years of follow-up), and competition between pharmaceutical companies.

In summary, these trials should be called “CV safety trials” and not “CV outcome trials” owing to the trial goals and design, the patient population chosen, the minimization of glycemic differences between treatment arms, and the relatively short duration. The recent finding of a significant benefit of empagliflozin in a similarly designed CV safety trial (6) was completely unexpected; despite this unpredictable result, the design of those trials remains inadequate for exploring treatment benefits.

**Choosing the Primary Outcome: MACE Versus MACE Plus—Is There a Difference?**

The FDA guidance specifies that CV end points should be prospectively and blindly adjudicated by an independent committee in all trials of clinical development of new drugs. The CV end points that must be adjudicated are CV mortality, myocardial infarction (MI), and stroke, combined in the composite end point, major adverse CV events (MACEs). Other CV end points specifically mentioned in the FDA guidance that can also be adjudicated are hospitalization for acute coronary syndrome (ACS), urgent revascularization procedures, “and possibly other end-points” (1). Some of the companies have chosen to add hospitalization for unstable angina, urgent coronary revascularization, and/or hospitalization for heart failure (hHF) to the definition of MACE (Table 1), although these end points are less “clear-cut” and more difficult to define; this

increases overall event rates, thus reducing required sample size, but it limits the reliability of results, augmenting background noise and biasing results in favor of “no difference” between treatment arms (16).

#### **Choosing the Trial Population and Its Effect on Study Conduct and Results**

In the FDA 2008 guidance (1), patients with “higher CV risk” to be included in CV safety analysis were defined as “patients with relatively advanced disease, elderly patients, and patients with some degree of renal impairment.” Pharmaceutical companies and researchers followed these instructions yet chose different inclusion and exclusion criteria in different CV safety trials (Table 1). Patients in EXAMINE and ELIXA (4) had experienced recent ACS, whereas those in TECOS had previous CV disease (5). Conversely, in the SAVOR-TIMI 53 trial 21.7% of enrolled patients had no prior CV events but showed at least two risk factors (17). The selection of a higher-risk population increases CV event rate, thus reducing the sample size and/or the duration of the trial. For example, if the expected annual event rate is 3% instead of 2%, with a 5-year follow-up, the sample needed to prove CV safety according to the FDA requirement is 5,400 patients instead of 8,000 (16). However, the downside of using such a specific high-CV risk population is the external validity of trial results. Alogliptin was shown to be safe in patients with ACS during the last 90 days (4), but the inference of those results to patients with stable CV disease, or with high CV risk without prior events is of uncertain validity.

#### **Other CV Safety Issues: hHF**

Unexpectedly, in the SAVOR-TIMI 53 trial, saxagliptin was associated with an increased rate of hHF (3.5 vs. 2.8%; hazard ratio [HR] 1.27 [95% CI 1.07–1.51];  $P = 0.007$ ) (3,18). This phenomenon occurred during the first year, with no significant difference thereafter. In EXAMINE, in which hHF was a component of a prespecified exploratory extended MACE end point, there was no statistically significant increase in the risk of first event of hHF with alogliptin versus placebo (3.1 vs. 2.9%; 1.07 [0.79–1.46]) (19). However, these results are still not sufficient to exclude a small increase in risk (20). In TECOS, in which hHF was a secondary outcome, the rate

of hHF in the sitagliptin arm (228 [3.1%]) was not statistically or numerically different from that in the placebo arm (229 [3.1%]) (HR 1.00 [95% CI 0.83–1.2]  $P = 0.98$ ) (5). The results of saxagliptin on hHF in the SAVOR-TIMI 53 trial could be a play of chance, a specific effect of that drug, or an effect of the class of drugs on specific (and still unidentified) subpopulations of patients. In fact, the TECOS and SAVOR-TIMI 53 populations, although similar in age (66 vs. 65.1 years) and diabetes duration (9.4 vs. 10.3 years), differ in other features: for example, inclusion of patients without prior CV disease (0 vs. 21.6%), HbA<sub>1c</sub> (7.2 vs. 8.0%), ethnicity (whites 67.9 vs. 75.3%), renal impairment (estimated glomerular filtration rate <50 mL/min [9.3 vs. 15.6%]), and/or use of insulin at baseline (23.2 vs. 41.4%).

None of the major CV safety trials with DPP-4 inhibitors were specifically designed to assess the effect of these drugs on heart failure, which was a secondary end point or part of a composite end point. This is a typical case in which a meta-analysis can add relevant information (see below).

#### **Other Predefined Safety Outcomes: Hypoglycemia, Weight Changes, Cancer, Pancreatitis, and Fractures**

Common adverse events (AEs) can be easily identified in phase II/III trials; conversely, rare AEs can be missed by those studies due to insufficient sample size and/or duration of observation (21). In addition, most early trials with diabetes drugs include only relatively healthy populations, who may be at lower risk of AEs (22). Large-scale trials designed for CV end points may yield important results for other safety issues.

#### **Hypoglycemia**

Targeting intensive glycemic control significantly increases the risk of severe hypoglycemia (23), which may increase CV disease risk (24).

However, there is a consistent heterogeneity in the incidence of severe hypoglycemia among trials, which could be attributable to various factors such as frailty, age, duration of disease, HbA<sub>1c</sub> targets, and therapeutic strategies. Severe hypoglycemia tends to be positively associated with baseline HbA<sub>1c</sub>; the higher the starting HbA<sub>1c</sub> value of the patient, the higher the event rate of severe hypoglycemia.

Notably, incretin-based therapy should be void of hypoglycemic risk owing to the ability of these drugs to stimulate insulin secretion with a glucose-dependent effect. However, in SAVOR-TIMI 53, episodes of severe hypoglycemia were significantly more frequent in the saxagliptin arm (2.1 vs. 1.7%,  $P = 0.047$ ) (3), whereas any hypoglycemic events were more frequent only in patients with a baseline HbA<sub>1c</sub> <7%. Almost all episodes were observed in patients treated with sulfonylureas (SUs), especially in those with HbA<sub>1c</sub> <7%. In EXAMINE (4) and TECOS (5), no increase in rates of hypoglycemia was reported with alogliptin and sitagliptin, respectively.

#### **Weight Changes**

The observed adherence to oral hypoglycemic drugs in patients with type 2 diabetes varies from 48.5 to 72.5% (25). Drug-induced weight gain is a well-known predictor of nonadherence (25). In addition, the increase in body weight induced by some glucose-lowering drugs may have an adverse effect on quality of life and on some CV risk factors (26). Weight gain induced by treatment intensification is influenced by the amount of HbA<sub>1c</sub> reduction, background therapy, and treatment strategy. When insulin is added to background metformin and SUs, weight gain is almost 3 kg; when TZDs are added the observed weight gain is >4 kg (27). In a meta-analysis of 40 randomized controlled trials, the use of secretagogues (SUs plus meglitinides) added to background metformin was associated with a weight gain of 1.9 kg (28).

Conversely, the use of DPP-4 inhibitors is not associated with weight gain: in SAVOR-TIMI 53, EXAMINE, and TECOS, no significant weight changes were observed. The main reasons for this may be related to lesser degrees of serious hypoglycemic events, to a delay in gastric emptying, and/or to a sense of satiety secondary to a direct hypothalamic effect (29).

#### **Cancer and Pancreatitis**

Type 2 diabetes may be associated with increased risk of malignancies (30); in addition, it is possible that some glucose-lowering drugs increase the risk for all cancers or specific forms of cancer. Such a concern has been raised also for GLP-1 receptor agonists and DPP-4 inhibitors. GLP-1 receptor activation directly promotes cell proliferation and enhances cell survival in several tissues

(31). It has been observed that GLP-1–based therapies can induce histological changes suggestive of pancreatic damage in rodents (32). An analysis of AEs reported to the FDA suggested that GLP-1 receptor agonists and DPP-4 inhibitors could be associated with pancreatitis and pancreatic cancer (33), but that result could have been heavily affected by underreporting and reporting bias. In fact, cohort studies failed to detect any signal of risk either for pancreatitis or for pancreatic cancer (34).

Reassuring findings are also available from SAVOR-TIMI 53, EXAMINE, and TECOS, which did not report any significant increase in risk of either pancreatitis or pancreatic cancer, although a modest trend toward an increased incidence of pancreatitis was reported in TECOS (3–5).

Finally, it has been observed in pre-clinical studies that the incidence of thyroid C-cell tumors is increased in rodents treated with GLP-1 analogs (35). Notably, in mouse and rat thyroid gland C cells, GLP-1 receptor densities are much higher than in humans and primates (36). The available CV safety trials confirm the safety of DPP-4 inhibitors in this respect; in fact, no case of thyroid medullary carcinoma was reported in SAVOR-TIMI 53, EXAMINE, or TECOS (3–5).

#### Pooled Analyses and Meta-analyses: Combining CV Outcome Studies and Trials With Other Outcomes

Meta-analyses are typically performed when there is a multiplicity of available studies that either provide inconsistent results or lack adequate statistical power because of insufficient sample size. CV trials performed with molecules of the same class, which can be assumed to have a similar profile of action on CV risk, can be combined in a meta-analysis, thus increasing their power to detect even small differences between treatment groups. However, it is unlikely that such a meta-analysis would provide any relevant

additional information on the effect of DPP-4 inhibitors on major CV events, in which the sample size was calculated to have an adequate power to explore the principal end point (i.e., MACE).

On the other hand, a meta-analysis of CV trials could be useful for the exploration of secondary end points or of individual components of the principal end points, for which each trial is underpowered. A typical example is hHF, which was significantly increased with saxagliptin in the SAVOR-TIMI 53 trial (3). In the CV trial with alogliptin, the difference between treatment groups for hHF was not statistically significant, but this could have been the consequence of a smaller overall number of events, with a lower statistical power (19); on the other hand, no such effect was detected with sitagliptin in TECOS (5). A meta-analysis of all available trials with DPP-4 inhibitors (including those with a non-CV end point, but not TECOS, which was unavailable at the time) confirmed an increased risk for heart failure (37). However, when trials with a non-CV end point (i.e., phase II–III studies) were considered separately, no signal of risk was detected, with no significant difference across molecules (37). This result is consistent with the hypothesis that the increased risk observed with saxagliptin in SAVOR-TIMI 53 may have been related to the characteristics of the patients enrolled. In the case of heart failure with DPP-4 inhibitors, the number of available large-scale trials is insufficient to draw definitive conclusions through meta-analysis. Further insight may be provided by a pooled analysis of patient-level data from the CV safety trials (SAVOR-TIMI 53, EXAMINE, and TECOS), exploring the effect of DPP-4 inhibitor treatment on different subgroups of patients categorized for their baseline characteristics, with the molecule used as a categorical covariate. However, such an analysis would pose

many technical and organizational challenges, considering differences in protocols across studies.

Information on CV events provided by meta-analyses and pooled analyses is particularly relevant when no CV outcome study is yet available. Under current regulations, most new drugs are marketed on the basis of a clinical program composed of studies with metabolic end points, with a large-scale, noninferiority CV study performed only after marketing, to confirm the safety of the drug. While long-term studies are ongoing, combined analyses of shorter-term trials can provide some insights on possible CV actions of new treatments. In the case of DPP-4 inhibitors, pooled analyses of CV events in randomized phase II–III studies have been published for all molecules (38–42); all these analyses yielded risk estimates <1, although differences from comparator groups were not statistically significant (Table 2). Data from different analyses are not comparable, because the definition of events and the trial entry criteria are heterogeneous. In addition, in some of the analyses CV events had not been adjudicated (38).

Pooled analyses, which combine patient-level data, can be performed only by companies that hold the property of data collected during clinical development of new drugs. Independent researchers, without access to patient-level data, can only pool trial-level results from studies in a post hoc meta-analysis, which allows the combination of trials with different drugs from the same class, estimating an overall class effect. Since some of the trials submitted to regulatory authorities remain unpublished, it is important that all disclosed trials, including those not published in medical journals, are included in the meta-analysis. Notably, in such analysis only the crude number of events is available, whereas time to event remains unknown; this produces an imprecision in risk

**Table 2—Pooled analyses of major CV events based on patient-level data from phase II–III trials with DPP-4 inhibitors**

| Reference                    | Drug         | # Studies | # Patients<br>(drug/comparator) | # Events<br>(drug/comparator) | Adjudicated | Risk estimate<br>(HR [95% CI]) |
|------------------------------|--------------|-----------|---------------------------------|-------------------------------|-------------|--------------------------------|
| Engel et al. (38), 2013      | Sitagliptin  | 25        | 7,726/6,885                     | 40/38                         | No          | 0.83 [0.53–1.30]               |
| Iqbal et al. (39), 2014      | Saxagliptin  | 20        | 5,701/3,455                     | 43/31                         | Yes         | 0.75 [0.46–1.21]               |
| Rosenstock et al. (40), 2015 | Linagliptin  | 19        | 5,847/3,612                     | 60/62                         | Yes         | 0.78 [0.55–1.12]               |
| Schweizer et al. (41), 2010  | Vildagliptin | 25        | 7,509/6,061                     | 81/91                         | Yes         | 0.84 [0.62–1.14]               |
| White et al. (4), 2013       | Alogliptin   | 11        | 4,162/1,855                     | 13/10                         | Yes         | 0.63 [0.00–1.41]               |

estimates, which is negligible in short-term studies but which can be relevant if the duration of treatment is very long. The lack of adjudication of events and the short duration of treatment are also major limitations for post hoc meta-analyses. Furthermore, it is possible that some trials with unfavorable results for experimental drugs remain undisclosed or that CV outcomes are only partially reported, thus producing a systematic bias. All these methodological issues suggest caution in the interpretation of results from post hoc meta-analyses. However, it is notable that all post hoc analyses (8–10,43) reported a significant reduction in the incidence of major CV events, with risk estimates ranging from 0.36 to 0.71 (Table 3); the only exception is a meta-analysis that included two CV studies (SAVOR-TIMI 53 and EXAMINE) along with earlier trials, with the former largely driving the overall result (44). One of the largest of those meta-analyses (8) also reported a significant reduction of all-cause mortality—the only end point unaffected by event adjudication.

#### Why Are the Results of Pooled Analyses and Meta-analyses of Early Trials Different From Those of Studies With a CV End Point?

The difference in results between pooled analyses and meta-analyses of early studies, on one side, and CV trials, on the other, is quite substantial. The methodological limitation of pooled analyses and meta-analyses summarized above, although relevant, does not seem sufficient for inducing such a large distortion. It has been suggested that differences in results could be determined by the duration of trials, with DPP-4 inhibitors producing a benefit in the short-term, which is lost with longer-term treatment (45). This view is not confirmed by CV trials, in which no evidence of a temporary benefit is present in the first few months after randomization; in addition, a significant reduction of major CV events is observed in non-CV outcome trials with DPP-4 inhibitors with duration of treatment >52 weeks (46). Another possible explanation for the observed difference is the diversity in the characteristics of enrolled patients. Subjects recruited in CV studies, who are selected for high CV risk, are typically

**Table 3—Post hoc meta-analyses of major CV events based on trial-level data with DPP-4 inhibitors**

| Reference                      | # Studies       | # Patients (drug/comp) | # Events (drug/comp) | Risk estimate (HR [95% CI])   |
|--------------------------------|-----------------|------------------------|----------------------|-------------------------------|
| Not including CV safety trials |                 |                        |                      |                               |
| Monami et al. (37), 2014       | 63              | 23,562/16,509          | 263/232              | 0.71 (0.59–0.86)              |
| Patil et al. (43), 2012        | 18              | 4,998/3,546            | 45/56                | 0.48 (0.61–0.75)              |
| Wu et al. (9), 2014            | 8 <sup>a</sup>  | 7,778                  | 6/18 <sup>a</sup>    | 0.36 (0.15–0.85) <sup>a</sup> |
|                                | 50 <sup>b</sup> |                        | 10/12 <sup>b</sup>   | 0.54 (0.25–1.19) <sup>b</sup> |
| Zhang et al. (10), 2014        | 12              | 5,505/5,477            | 25/43 <sup>c</sup>   | 0.53 (0.32–0.87) <sup>c</sup> |
| Including CV safety trials     |                 |                        |                      |                               |
| Agarwal et al. (44), 2014      | 80              | 40,749/32,592          | NR                   | 0.95 (0.86–1.04)              |

NR, not reported. <sup>a</sup>Versus metformin, monotherapy; <sup>b</sup>versus placebo, add-on to metformin; <sup>c</sup>versus SUs.

older with longer duration of diabetes, greater impairment of renal function, higher comorbidity, and higher number of concomitant treatments than those participating in earlier trials with metabolic end points. It is possible that DPP-4 inhibitors produce a CV benefit in relatively low-risk patients, whereas they are neutral in subjects at very high risk or with prior CV events.

The enrollment of subjects at high CV risk is a practical strategy for yielding a high number of events with a limited sample size and duration of observation. It is also reasonable to verify safety in those patients who are at greatest risk of adverse outcomes. On the other hand, patients enrolled in CV trials with DPP-4 inhibitors are scarcely/hardly representative of those actually receiving a prescription of those drugs in clinical practice.

#### Conclusions

The results of the first CV trials with DPP-4 inhibitors (3–5) did not meet the expectations of many clinicians, who hoped for a demonstration of a CV benefit, as suggested by meta-analyses of previous, shorter-term studies (8–10,43). However, CV trials provided exactly the result that they had been designed for: noninferiority versus placebo. CV trials in diabetes simply demonstrate that drugs do not catastrophically increase CV risk. The unexpected finding of a significantly beneficial effect of the active drug, as with empagliflozin (6), given the design of those studies, is almost a case of serendipity.

The explanation of differences in CV outcomes between earlier studies and CV safety trials is complex. Our opinion is that methodological issues are not

sufficient to account for such difference and that the more favorable result of an earlier trial is the effect of the enrollment of younger, healthier patients with fewer complications, with a lower proportion of subjects receiving other medications for the reduction of CV risk. However, available data are not sufficient to confirm such a hypothesis, which could be proven only through a specifically designed CV outcome trial in patients with diabetes at low risk—which is very unlikely to be ever performed.

CV trials provide a huge amount of safety data. Large-scale trials of appropriate duration, although designed for major CV events, yield relevant information on other safety end points (for example, with DPP-4 inhibitors, pancreatitis). Exposure of several thousand patient-years to an experimental drug also warrants the detection of relatively infrequent AEs. However, in this latter case, unless results are consistent across trials with molecules of the same class, the interpretation of results can be overwhelmingly difficult. This is what happened for the unexpected (and problematic) finding of increased hHF with saxagliptin in SAVOR-TIMI 53.

Although the results of CV safety studies could underestimate the actual benefit of DPP-4 inhibitors on CV outcomes, a recent study with a similar design did show a significant reduction of CV morbidity and mortality with the SGLT2 inhibitor empagliflozin (6). Although the characteristics of patients enrolled in this latter trial (5) are not exactly the same as in trials with DPP-4 inhibitors (3–5), the fact that results with empagliflozin in patients with prior CV events were much improved compared with those observed with saxagliptin,

alogliptin, or sitagliptin should be clearly recognized.

Inevitably, information on safety is excellent for newer agents but largely missing for older drugs. This creates an information disequilibrium, for which safety issues have a greater probability of being raised for newer drugs, while they may remain unnoticed, or underestimated, for older agents. Another problem with the current approach is that populations enrolled in CV trials can be quite different from those that, on average, receive a prescription for a drug in the real-world. This can lead to an overestimation of safety issues with newer agents.

Finally, the most important drawback of CV safety trials is their excruciatingly high cost, which has an impact on the price, and therefore the widespread availability, of newer agents. Furthermore, pharmaceutical companies, being forced to invest huge budgets on placebo-controlled CV trials, tend to shrink their development programs on the side of phase III active-comparator controlled trials, which are probably more useful for clinical decision making and which could be more cost-efficient.

The decision of the FDA to require safety data from large-scale, specifically designed trials had the merit of focusing the attention of the scientific community on the relevance of CV safety of glucose-lowering drugs. At the same time, the unintended negative consequences of this decision may outweigh the benefits. As an alternative, CV safety could be assessed through pooled analyses of patient-level data from wider programs of active comparator-controlled phase III trials of appropriate duration, provided that a relevant fraction of patients at high CV risk is included and that MACEs are appropriately adjudicated. This would probably require a safety criterion less stringent than the present 1.3 for upper confidence limit (1); however, additional real-world data could be obtained through specific programs for postmarketing surveillance, thus avoiding specific CV safety trials.

**Funding and Duality of Interest.** E.M. has received speaking and/or consulting honoraria from AstraZeneca, Boehringer Ingelheim, Eli Lilly, Janssen, Merck, Novartis, Novo Nordisk, Sanofi, and Takeda and research grants from AstraZeneca, Boehringer Ingelheim, Eli Lilly,

Novartis, Novo Nordisk, Takeda, and Sanofi. O.M. has received speaking fees from AstraZeneca and Bristol-Myers Squibb, Novo Nordisk, Eli Lilly, Sanofi, Novartis, Merck Sharp & Dohme, and Kyowa Hakko Kirin; consulting fees from Novo Nordisk, Eli Lilly, Sanofi, Novartis, AstraZeneca, Boehringer Ingelheim, and Janssen; and research grants from AstraZeneca, Bristol-Myers Squibb, and Novo Nordisk. A.A. has received research grants from the Strategic Project DYCEMEDI from the University of Padova STPD11ALFE and has also received speaking honoraria from Novartis, Eli Lilly, Novo Nordisk, Sanofi, Boehringer Ingelheim, AstraZeneca, Mediolanum, Servier, Janssen, and Merck Sharp & Dohme; financial support for attending symposia from Novartis, Eli Lilly, Novo Nordisk, Sanofi, Boehringer Ingelheim, and AstraZeneca; financial support for educational programs from Novartis; consulting fees from Novartis, Eli Lilly, Novo Nordisk, Sanofi, Boehringer Ingelheim, AstraZeneca, Mediolanum, Servier, Janssen, and Merck Sharp & Dohme; and research grants from Boehringer Ingelheim and AstraZeneca. No other potential conflicts of interest relevant to this article were reported.

**Author Contributions.** E.M., O.M., and A.A. contributed to collection of relevant references, discussion of their clinical implications, writing of the manuscript, and revision of the text.

## References

1. U.S. Food and Drug Administration. Guidance for industry: evaluating cardiovascular risk in new antidiabetic therapies. Available from <http://www.fda.gov/downloads/Drugs/GuidanceComplianceRegulatoryInformation/Guidances/ucm071627.pdf>. Accessed 3 August 2015
2. Hirshberg B, Raz I. Impact of the U.S. Food and Drug Administration cardiovascular assessment requirements on the development of novel antidiabetes drugs. *Diabetes Care* 2011; 34(Suppl. 2):S101–S106
3. Scirica BM, Bhatt DL, Braunwald E, et al.; SAVOR-TIMI 53 Steering Committee and Investigators. Saxagliptin and cardiovascular outcomes in patients with type 2 diabetes mellitus. *N Engl J Med* 2013;369:1317–1326
4. White WB, Cannon CP, Heller SR, et al.; EXAMINE Investigators. Alogliptin after acute coronary syndrome in patients with type 2 diabetes. *N Engl J Med* 2013;369:1327–1335
5. Green JB, Bethel MA, Armstrong PW, et al.; TECOS Study Group. Effect of sitagliptin on cardiovascular outcomes in type 2 diabetes. *N Engl J Med* 2015;373:232–242
6. Zinman B, Wanner C, Lachin JM, et al.; EMPA-REG OUTCOME Investigators. Empagliflozin, cardiovascular outcomes, and mortality in type 2 diabetes. *N Engl J Med* 2015;373:2117–2128
7. Hirshberg B, Katz A. Cardiovascular outcome studies with novel antidiabetes agents: scientific and operational considerations. *Diabetes Care* 2013;36(Suppl. 2):S253–S258
8. Monami M, Ahrén B, Dicembrini I, Mannucci E. Dipeptidyl peptidase-4 inhibitors and cardiovascular risk: a meta-analysis of randomized clinical trials. *Diabetes Obes Metab* 2013;15:112–120
9. Wu D, Li L, Liu C. Efficacy and safety of dipeptidyl peptidase-4 inhibitors and metformin as

initial combination therapy and as monotherapy in patients with type 2 diabetes mellitus: a meta-analysis. *Diabetes Obes Metab* 2014;16:30–37

10. Zhang Y, Hong J, Chi J, Gu W, Ning G, Wang W. Head-to-head comparison of dipeptidyl peptidase-IV inhibitors and sulfonylureas - a meta-analysis from randomized clinical trials. *Diabetes Metab Res Rev* 2014;30:241–256
11. Skyler JS, Bergenstal R, Bonow RO, et al.; American Diabetes Association; American College of Cardiology Foundation; American Heart Association. Intensive glycemic control and the prevention of cardiovascular events: implications of the ACCORD, ADVANCE, and VA diabetes trials: a position statement of the American Diabetes Association and a scientific statement of the American College of Cardiology Foundation and the American Heart Association. *Diabetes Care* 2009;32:187–192
12. Bergenstal RM, Bailey CJ, Kendall DM. Type 2 diabetes: assessing the relative risks and benefits of glucose-lowering medications. *Am J Med* 2010; 123:9–18
13. Gaede P, Lund-Andersen H, Parving HH, Pedersen O. Effect of a multifactorial intervention on mortality in type 2 diabetes. *N Engl J Med* 2008;358:580–591
14. Ibrahim JG, Chen MH, Xia HA, Liu T. Bayesian meta-experimental design: evaluating cardiovascular risk in new antidiabetic therapies to treat type 2 diabetes. *Biometrics* 2012;68:578–586
15. Mega JL, Braunwald E, Wiviott SD, et al.; ATLAS ACS 2-TIMI 51 Investigators. Rivaroxaban in patients with a recent acute coronary syndrome. *N Engl J Med* 2012;366:9–19
16. Joffe HV, Parks MH, Temple R. Impact of cardiovascular outcomes on the development and approval of medications for the treatment of diabetes mellitus. *Rev Endocr Metab Disord* 2010;11:21–30
17. Mosenzon O, Raz I, Scirica BM, et al. Baseline characteristics of the patient population in the Saxagliptin Assessment of Vascular Outcomes Recorded in Patients with Diabetes Mellitus (SAVOR)-TIMI 53 trial. *Diabetes Metab Res Rev* 2013;29:417–426
18. Scirica BM, Braunwald E, Raz I, et al.; SAVOR-TIMI 53 Steering Committee and Investigators. Heart failure, saxagliptin, and diabetes mellitus: observations from the SAVOR-TIMI 53 randomized trial. *Circulation* 2014;130:1579–1588
19. Zannad F, Cannon CP, Cushman WC, et al.; EXAMINE Investigators. Heart failure and mortality outcomes in patients with type 2 diabetes taking alogliptin versus placebo in EXAMINE: a multicentre, randomised, double-blind trial. *Lancet* 2015;385:2067–2076
20. Standl E, Schnell O. DPP-4 inhibitors and risk of heart failure EXAMINED. *Lancet* 2015; 385:2022–2024
21. French DD, Margo CE, Campbell RR. Enhancing postmarketing surveillance: continuing challenges. *Br J Clin Pharmacol* 2015;80:615–617
22. Lakey WC, Barnard K, Batch BC, Chiswell K, Tasneem A, Green JB. Are current clinical trials in diabetes addressing important issues in diabetes care? *Diabetologia* 2013;56:1226–1235



23. Hemmingsen B, Lund SS, Gluud C, et al. Intensive glycaemic control for patients with type 2 diabetes: systematic review with meta-analysis and trial sequential analysis of randomised clinical trials. *BMJ* 2011;343:d6898
24. Goto A, Arah OA, Goto M, Terauchi Y, Noda M. Severe hypoglycaemia and cardiovascular disease: systematic review and meta-analysis with bias analysis. *BMJ* 2013;347:f4533
25. Mateo JF, Gil-Guillén VF, Mateo E, Orozco D, Carbayo JA, Merino J. Multifactorial approach and adherence to prescribed oral medications in patients with type 2 diabetes. *Int J Clin Pract* 2006;60:422–428
26. Strandberg TE, Strandberg A, Salomaa VV, Pitkälä K, Tilvis RS, Miettinen TA. The association between weight gain up to midlife, 30-year mortality, and quality of life in older men. *Arch Intern Med* 2007;167:2260–2261
27. Gross JL, Kramer CK, Leitão CB, et al.; Diabetes and Endocrinology Meta-analysis Group (DEMA). Effect of antihyperglycemic agents added to metformin and a sulfonylurea on glycemic control and weight gain in type 2 diabetes: a network meta-analysis. *Ann Intern Med* 2011;154:672–679
28. McIntosh B, Cameron C, Singh SR, et al. Second-line therapy in patients with type 2 diabetes inadequately controlled with metformin monotherapy: a systematic review and mixed-treatment comparison meta-analysis. *Open Med* 2011;5:e35–e48
29. Toft-Nielsen MB, Madsbad S, Holst JJ. Continuous subcutaneous infusion of glucagon-like peptide 1 lowers plasma glucose and reduces appetite in type 2 diabetic patients. *Diabetes Care* 1999;22:1137–1143
30. Tsilidis KK, Kasimis JC, Lopez DS, Ntzani EE, Ioannidis JP. Type 2 diabetes and cancer: umbrella review of meta-analyses of observational studies. *BMJ* 2015;350:g7607
31. Brubaker PL, Drucker DJ. Minireview: glucagon-like peptides regulate cell proliferation and apoptosis in the pancreas, gut, and central nervous system. *Endocrinology* 2004;145:2653–2659
32. Butler PC, Dry S, Elashoff R. GLP-1-based therapy for diabetes: what you do not know can hurt you. *Diabetes Care* 2010;33:453–455
33. Elashoff M, Matveyenko AV, Gier B, Elashoff R, Butler PC. Pancreatitis, pancreatic, and thyroid cancer with glucagon-like peptide-1-based therapies. *Gastroenterology* 2011;141:150–156
34. Montilla S, Marchesini G, Sammarco A, et al.; AIFA Anti-diabetics Monitoring Group. Drug utilization, safety, and effectiveness of exenatide, sitagliptin, and vildagliptin for type 2 diabetes in the real world: data from the Italian AIFA Anti-diabetics Monitoring Registry. *Nutr Metab Cardiovasc Dis* 2014;24:1346–1353
35. Chiu WY, Shih SR, Tseng CH. A review on the association between glucagon-like peptide-1 receptor agonists and thyroid cancer. *Exp Diabetes Res* 2012;2012:924168
36. Waser B, Beetschen K, Pellegata NS, Reubi JC. Incretin receptors in non-neoplastic and neoplastic thyroid C cells in rodents and humans: relevance for incretin-based diabetes therapy. *Neuroendocrinology* 2011;94:291–301
37. Monami M, Dicembrini I, Mannucci E. Dipeptidyl peptidase-4 inhibitors and heart failure: a meta-analysis of randomized clinical trials. *Nutr Metab Cardiovasc Dis* 2014;24:689–697
38. Engel SS, Golm GT, Shapiro D, Davies MJ, Kaufman KD, Goldstein BJ. Cardiovascular safety of sitagliptin in patients with type 2 diabetes mellitus: a pooled analysis. *Cardiovasc Diabetol* 2013;12:3
39. Iqbal N, Parker A, Frederich R, Donovan M, Hirshberg B. Assessment of the cardiovascular safety of saxagliptin in patients with type 2 diabetes mellitus: pooled analysis of 20 clinical trials. *Cardiovasc Diabetol* 2014;13:33
40. Rosenstock J, Marx N, Neubacher D, et al. Cardiovascular safety of linagliptin in type 2 diabetes: a comprehensive patient-level pooled analysis of prospectively adjudicated cardiovascular events. *Cardiovasc Diabetol* 2015;14:57
41. Schweizer A, Dejager S, Foley JE, Couturier A, Ligueros-Saylan M, Kothny W. Assessing the cardio-cerebrovascular safety of vildagliptin: meta-analysis of adjudicated events from a large Phase III type 2 diabetes population. *Diabetes Obes Metab* 2010;12:485–494
42. White WB, Pratley R, Fleck P, et al. Cardiovascular safety of the dipeptidyl peptidase-4 inhibitor alogliptin in type 2 diabetes mellitus. *Diabetes Obes Metab* 2013;15:668–673
43. Patil HR, Al Badarin FJ, Al Shami HA, et al. Meta-analysis of effect of dipeptidyl peptidase-4 inhibitors on cardiovascular risk in type 2 diabetes mellitus. *Am J Cardiol* 2012;110:826–833
44. Agarwal S, Parashar A, Menon V. Meta-analysis of the cardiovascular outcomes with dipeptidyl peptidase 4 inhibitors: validation of the current FDA mandate. *Am J Cardiovasc Drugs* 2014;14:191–207
45. Savarese G, Perrone-Filardi P, D'Amore C, et al. Cardiovascular effects of dipeptidyl peptidase-4 inhibitors in diabetic patients: a meta-analysis. *Int J Cardiol* 2015;181:239–244
46. Dicembrini I, Mannucci E. Risk of myocardial infarction in trials with dipeptidyl peptidase-4 inhibitors: is duration of study a real issue? *Int J Cardiol* 2015;184:543–544
